# Supplementary material for: Ag2Se/nylon self-supporting composite films for wearable photo-thermoelectric generators with high output characteristics
Source: Royal Society of Chemistry journal article supplement (doi:10.1039/d2ta06064g), 2022-01-01
Supplement: d2ta06064g1.pdf [file d2ta06064g1.pdf]

## Support Information

### High output characteristic $\text{Ag}_2\text{Se}/\text{Nylon}$ self-supporting composite films for wearable photo-thermoelectrical generators

Zhen-yu Yang,<sup>§a</sup> Xin-zheng Jin,<sup>§a</sup> Wen-yan Wang,<sup>a</sup> Chen-hui Huang,<sup>a</sup> Yan-zhou Lei,<sup>b</sup> Yong Wang<sup>\*a</sup>

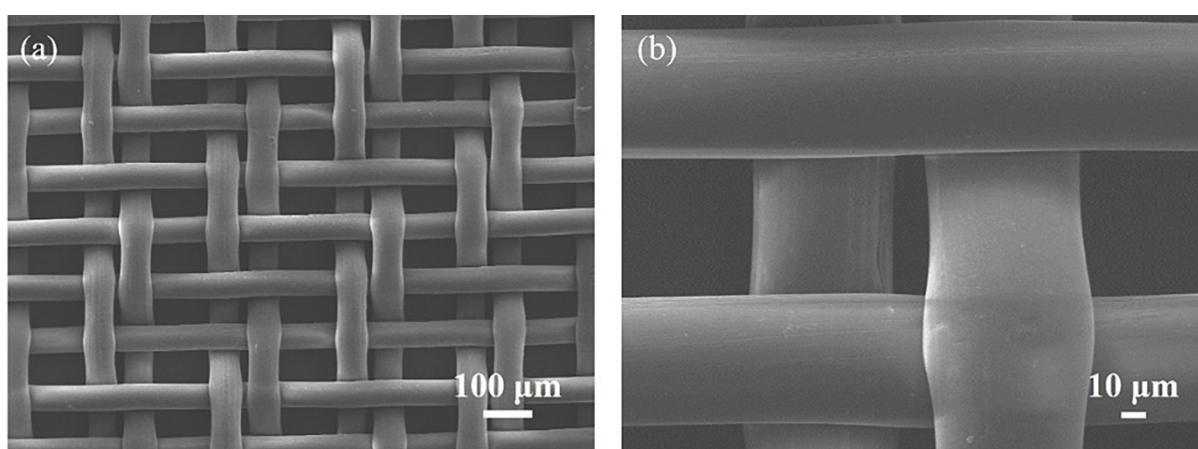

Figure S1. (a) Low and (b) high magnification surface FESEM images of commercial nylon mesh.

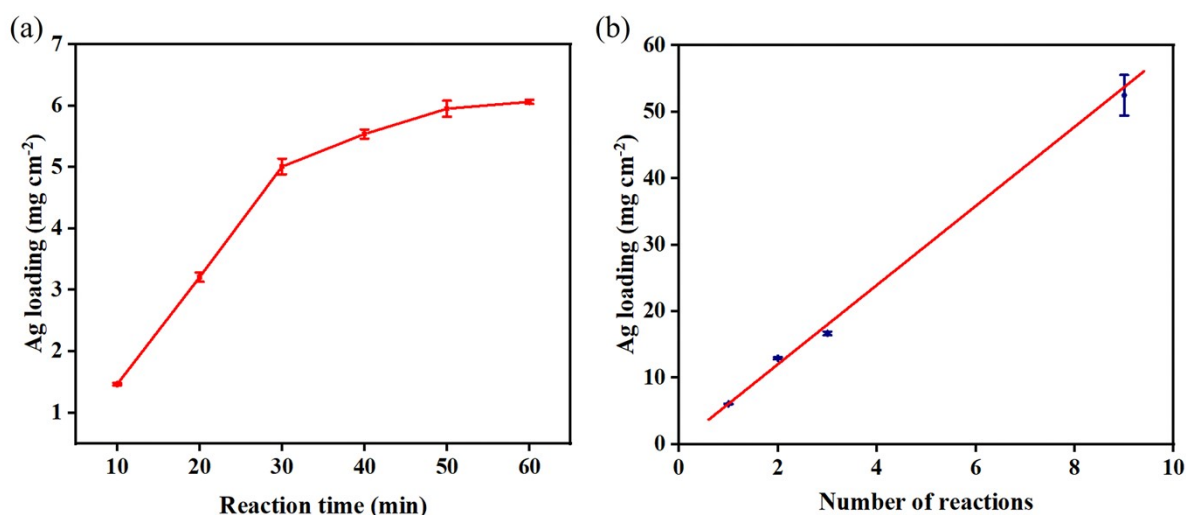

<sup>a</sup> School of Materials Science & Engineering, Key Laboratory of Advanced Technologies of Materials (Ministry of Education), Southwest Jiaotong University, Chengdu 610031, China. Phone: +86 28 87603042; Email: [yongwang1976@swjtu.edu.cn](mailto:yongwang1976@swjtu.edu.cn)

<sup>b</sup> Analytical and Testing Center, Southwest Jiaotong University, Chengdu 610031, China

<sup>§</sup> Co-first author. ORCID: Yong Wang: 0000-0003-0655-7507

**Figure S2.** Variation of silver loading in the silver mirror reaction with (a) reaction time and (b) numbers.

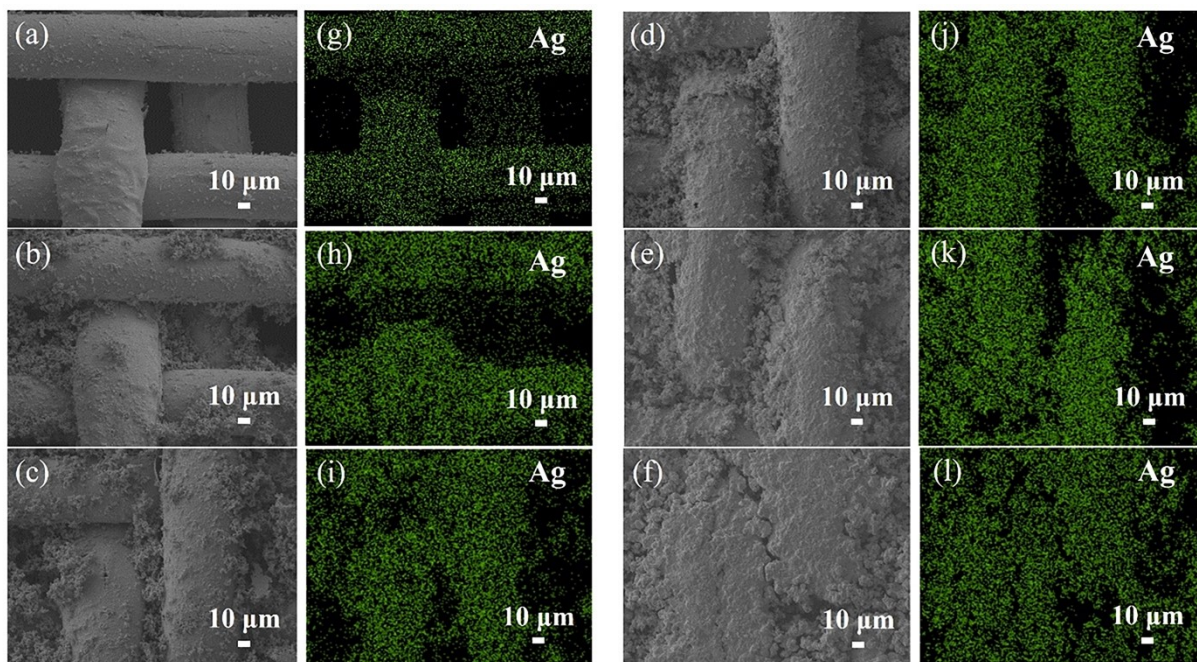

**Figure S3.** The morphologies of (a) 15Ag/85Nylon, (b) 35Ag/65Nylon, (c) 50Ag/50Nylon, (d) 60Ag/40Nylon, (e) 75Ag/25Nylon and (f) 90Ag/10Nylon. The EDS patterns of (g) 15Ag/85Nylon, (h) 35Ag/65Nylon, (i) 50Ag/50Nylon, (j) 60Ag/40Nylon, (k) 75Ag/25Nylon and (l) 90Ag/10Nylon.

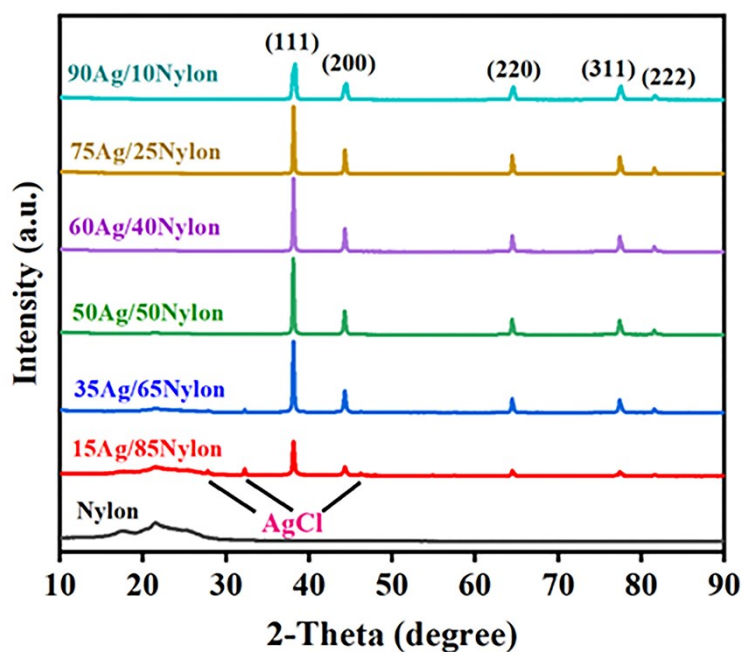

**Figure S4.** The XRD patterns of the nylon mesh and the prepared Ag/Nylon composite films with different contents of silver.

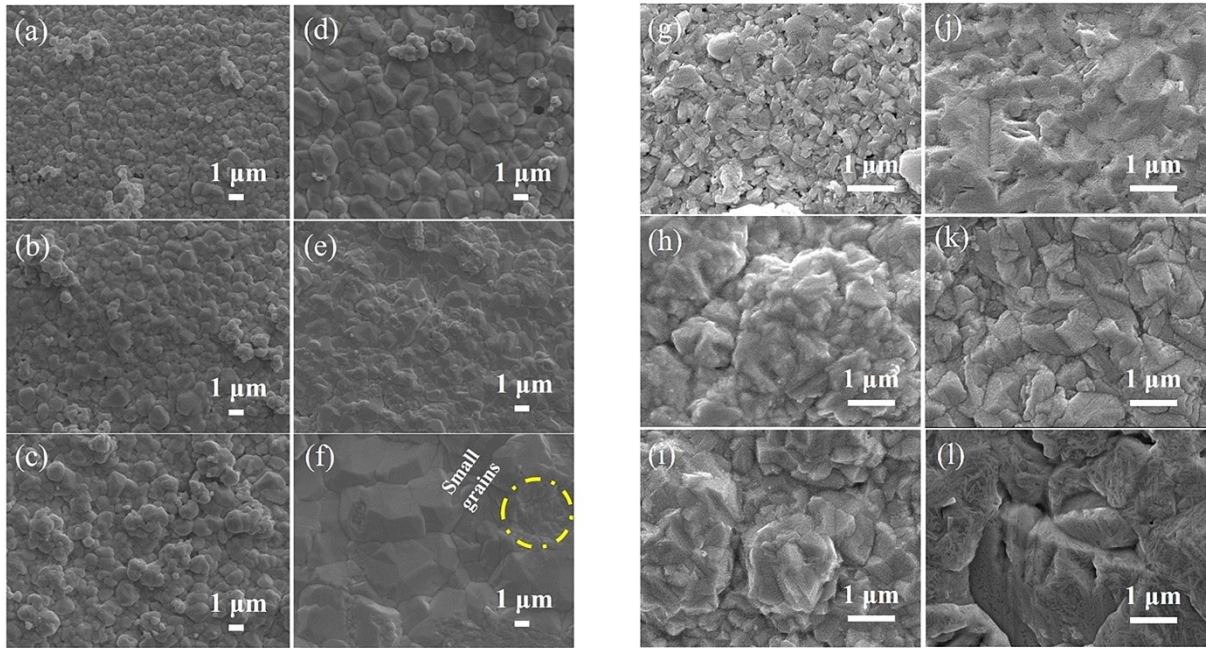

**Figure S5.** High magnification surface FESEM images of (a) 15Ag/85Nylon, (b) 35Ag/65Nylon, (c) 50Ag/50Nylon, (d) 60Ag/40Nylon, (e) 75Ag/25Nylon, (f) 90Ag/10Nylon, (g) 20Ag<sub>2</sub>Se/80Nylon, (h) 40Ag<sub>2</sub>Se/60Nylon, (i) 60Ag<sub>2</sub>Se/40Nylon, (j) 70Ag<sub>2</sub>Se/30Nylon, (k) 80Ag<sub>2</sub>Se/20Nylon and (l) 90Ag<sub>2</sub>Se/10Nylon.

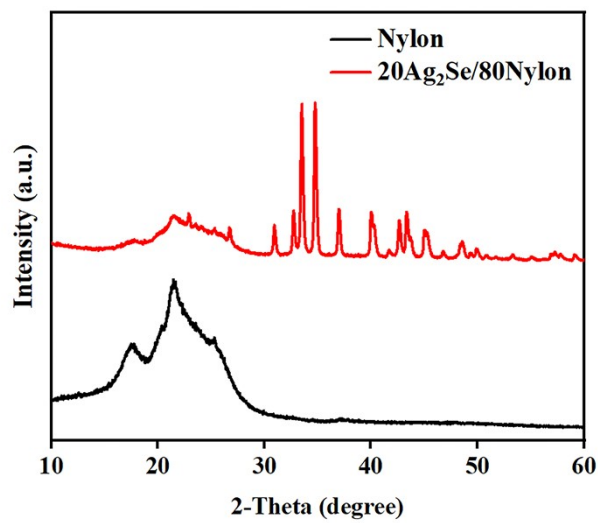

**Figure S6.** The XRD patterns of the nylon mesh and the prepared 20Ag<sub>2</sub>Se/80Nylon composite film.

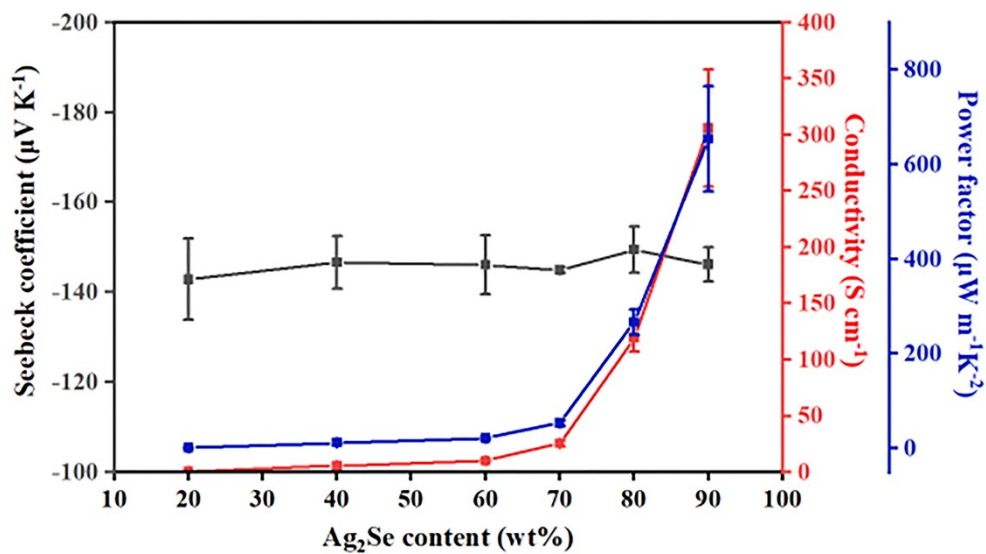

**Figure S7.** The electrical conductivity, Seebeck coefficient and power factor of Ag<sub>2</sub>Se/Nylon composite films with different loadings.

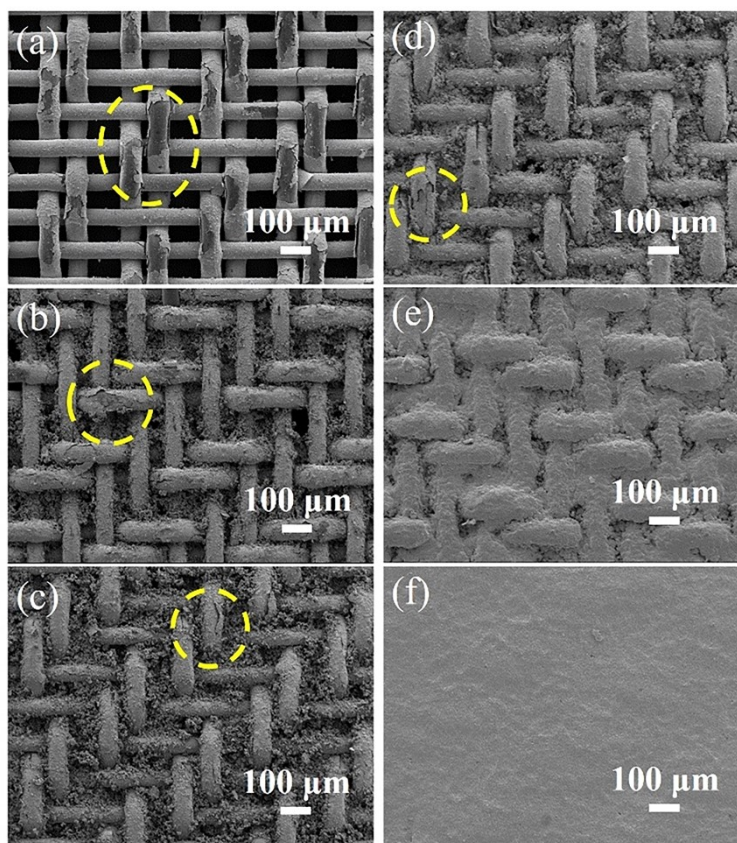

**Figure S8.** Low magnification surface FESEM images of (a) 20Ag<sub>2</sub>Se/80Nylon, (b) 40Ag<sub>2</sub>Se/60Nylon, (c) 60Ag<sub>2</sub>Se/40Nylon, (d) 70Ag<sub>2</sub>Se/30Nylon, (e) 80Ag<sub>2</sub>Se/20Nylon and (f) 90Ag<sub>2</sub>Se/10Nylon. Where the place marked by the yellow dotted line occurs obvious shedding phenomenon, the thicker Ag<sub>2</sub>Se layers present in the higher content samples make the shedding of a small amount of Ag<sub>2</sub>Se not lead to bare leakage, so the obvious

shedding phenomenon is not easily observed.

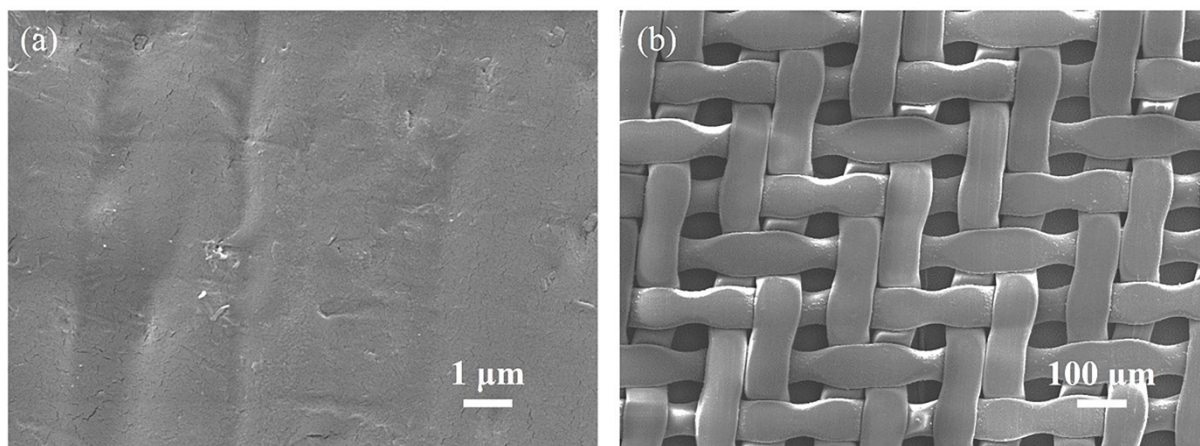

**Figure S9.** (a) High and (b) low magnification surface morphologies of nylon mesh after hot-pressing.

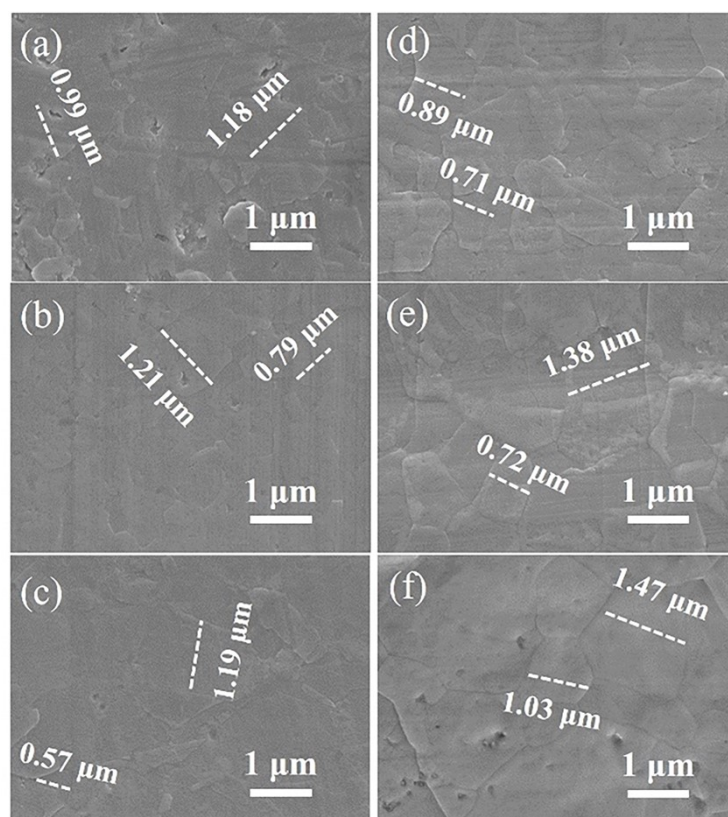

**Figure S10.** The morphologies of  $\text{Ag}_2\text{Se}$  grains in  $\text{Ag}_2\text{Se}/\text{Nylon}$  composite films after hot pressing. Figures a-f show 20 $\text{Ag}_2\text{Se}/80\text{Nylon-h}$ , 40 $\text{Ag}_2\text{Se}/60\text{Nylon-h}$ , 60 $\text{Ag}_2\text{Se}/40\text{Nylon-h}$ , 70 $\text{Ag}_2\text{Se}/30\text{Nylon-h}$ , 80 $\text{Ag}_2\text{Se}/20\text{Nylon-h}$  and 90 $\text{Ag}_2\text{Se}/10\text{Nylon-h}$  in order.

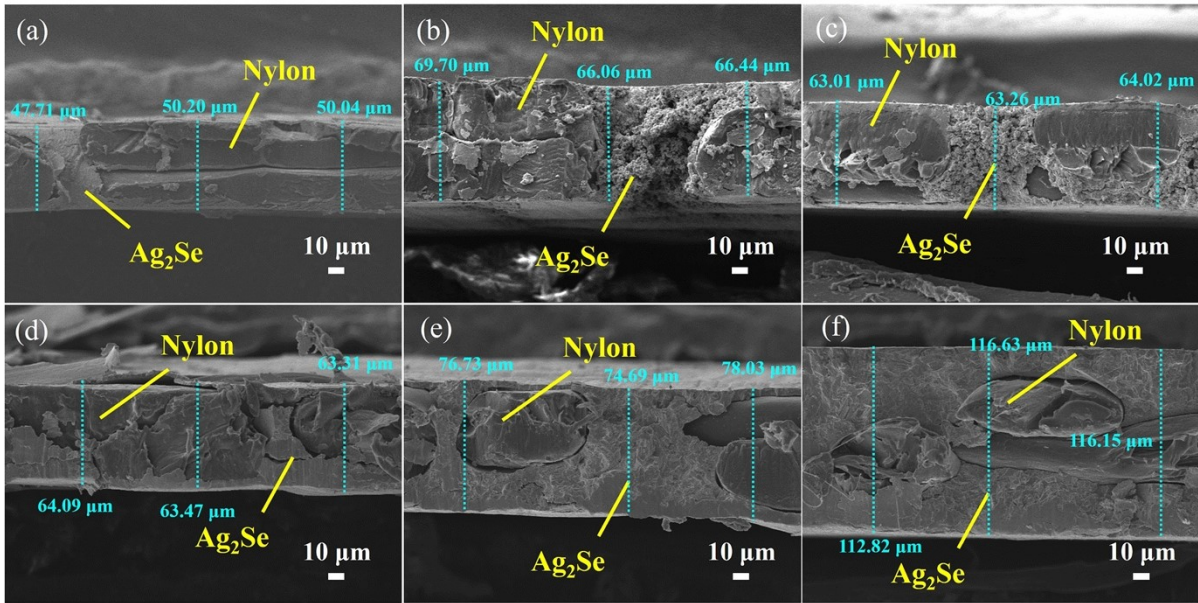

**Figure S11.** The cross-sectional FESEM images of  $\text{Ag}_2\text{Se}/\text{Nylon}$  composite films after hot pressing. Figures a-f also show composite films with  $\text{Ag}_2\text{Se}$  contents of (a) 20wt%, (b) 40wt%, (c) 60wt%, (d) 70wt%, (e) 80wt% and (f) 90wt%.

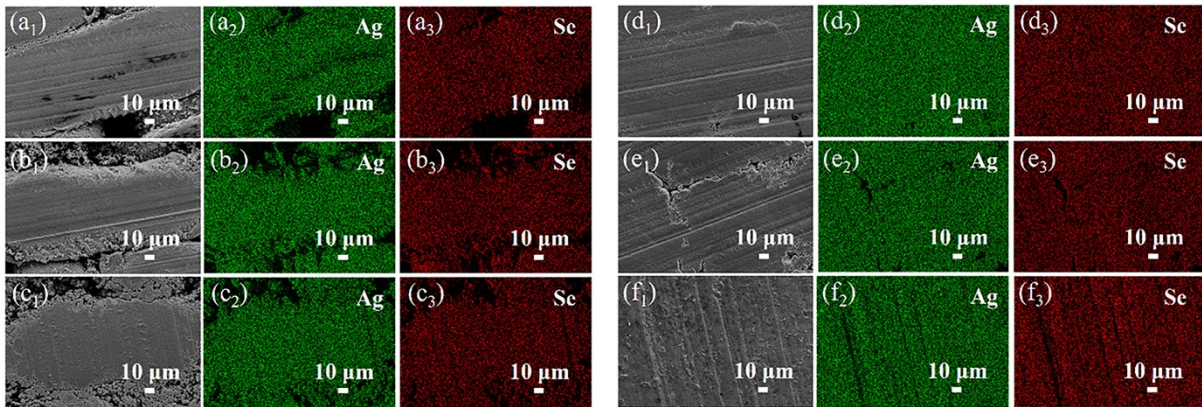

**Figure S12.** The EDS patterns of (a)  $20\text{Ag}_2\text{Se}/80\text{Nylon-h}$ , (b)  $40\text{Ag}_2\text{Se}/60\text{Nylon-h}$ , (c)  $60\text{Ag}_2\text{Se}/40\text{Nylon-h}$ , (d)  $70\text{Ag}_2\text{Se}/30\text{Nylon-h}$ , (e)  $80\text{Ag}_2\text{Se}/20\text{Nylon-h}$  and (f)  $90\text{Ag}_2\text{Se}/10\text{Nylon-h}$ .

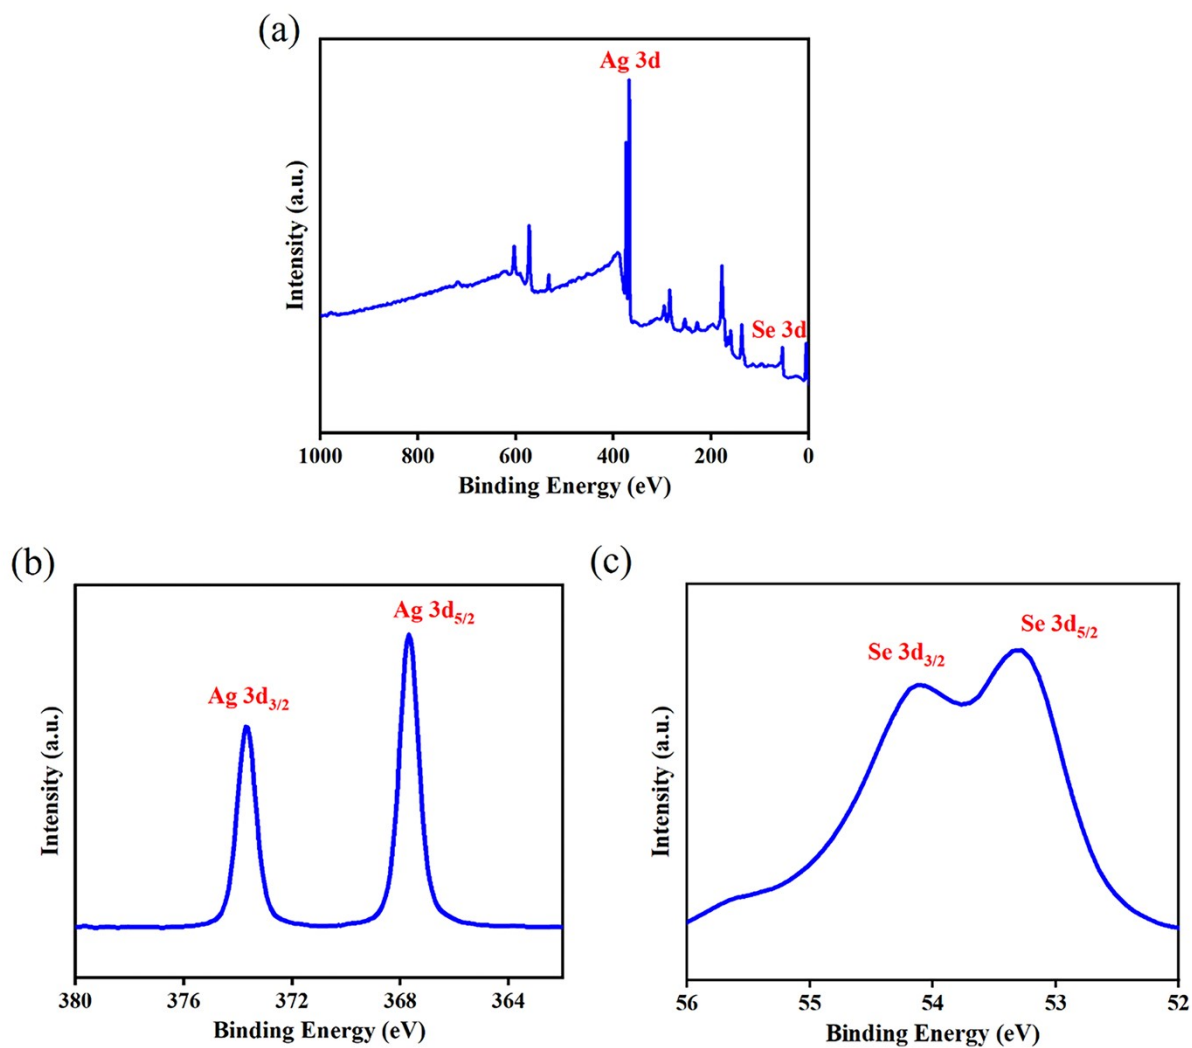

**Figure S13.** (a) XPS survey spectrum, and high-resolution Ag 3d (b) and Se 3d (c) core level spectra of the 80Ag<sub>2</sub>Se/20Nylon-h.

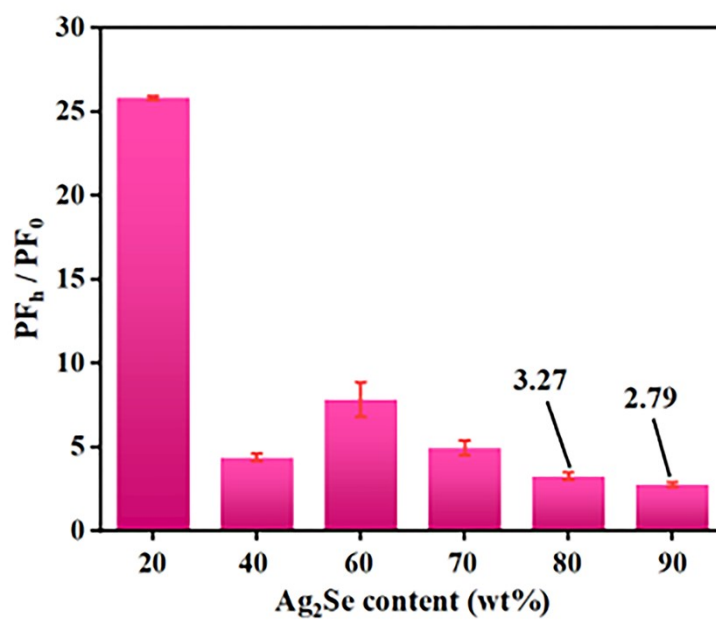

**Figure S14.** The ratio of the power factor of the composite films after hot-pressing to the composites before hot-pressing.  $PF_0$  and  $PF_h$  are the power factors of the  $Ag_2Se/Nylon$  composite film before and after hot-pressing respectively.

**Tables S1.** The density, specific heat capacity, out-of-plane and in-plane thermal diffusivity of the  $xAg_2Se/yNylon-h$  composite films obtained from the measurements.

| Sample                | Density<br>( $g\ cm^{-3}$ ) | Specific heat<br>capacity<br>( $J\ g^{-1}\ K^{-1}$ ) | Out-of-plane<br>thermal<br>diffusivity<br>( $mm^2s^{-1}$ ) | In-plane thermal<br>diffusivity<br>( $mm^2s^{-1}$ ) |
|-----------------------|-----------------------------|------------------------------------------------------|------------------------------------------------------------|-----------------------------------------------------|
| 20 $Ag_2Se/80Nylon-h$ | 1.36                        | 1.048                                                | 0.130±0.008                                                | 0.538±0.007                                         |
| 40 $Ag_2Se/60Nylon-h$ | 1.61                        | 0.930                                                | 0.129±0.030                                                | 0.545±0.014                                         |
| 60 $Ag_2Se/40Nylon-h$ | 1.83                        | 0.834                                                | 0.131±0.005                                                | 0.538±0.010                                         |
| 70 $Ag_2Se/30Nylon-h$ | 2.50                        | 0.627                                                | 0.133±0.017                                                | 0.545±0.026                                         |
| 80 $Ag_2Se/20Nylon-h$ | 3.41                        | 0.458                                                | 0.135±0.001                                                | 0.534±0.007                                         |
| 90 $Ag_2Se/10Nylon-h$ | 4.93                        | 0.317                                                | 0.168±0.001                                                | 0.519±0.003                                         |

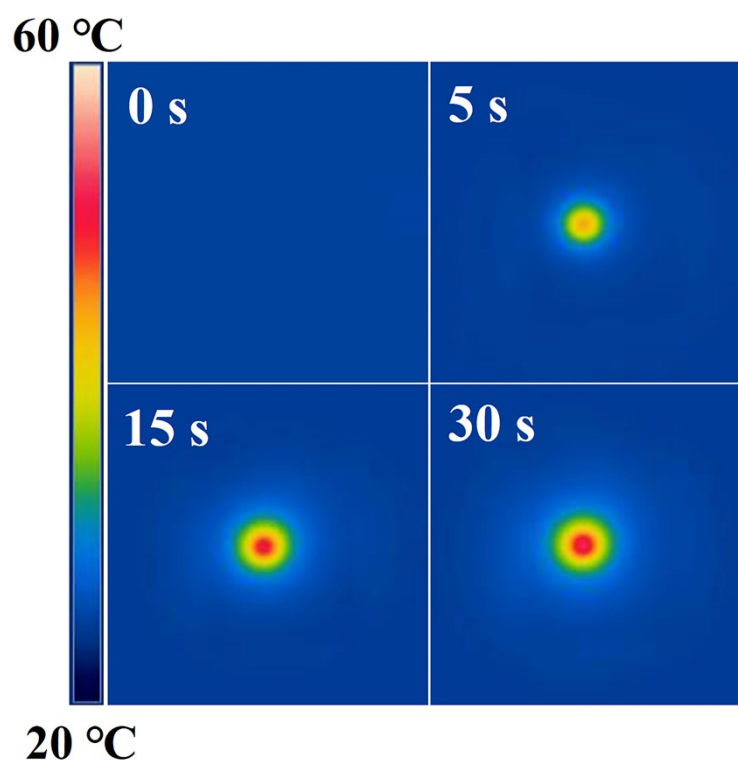

**Figure S15.** IR heat maps of the 80 $Ag_2Se/20Nylon-h$  when irradiated by 180  $mW\ cm^{-2}$  NIR light. The recording time of heat maps is 0 s, 5 s, 15 s and 30 s respectively.



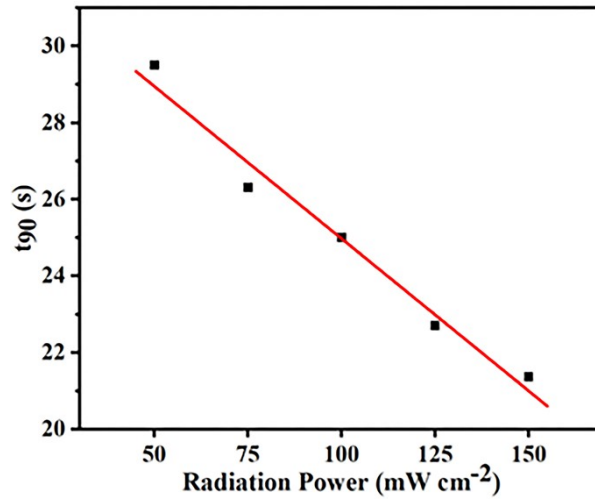

**Figure S16.** The time required for the PTEG to reach 90% of the maximum open-circuit output voltage with different power light radiation.

**Tables S2.** Comparison of our work with the reported power densities of PTEGs with different types.

| Index | Composite                                                                            | Light source mode                              | The number of legs | Power densities (nW cm <sup>-2</sup> ) | Ref             |
|-------|--------------------------------------------------------------------------------------|------------------------------------------------|--------------------|----------------------------------------|-----------------|
| 1     | Bi <sub>2</sub> Te <sub>2.7</sub> Se <sub>0.3</sub> /Sb <sub>2</sub> Te <sub>3</sub> | 20 mW cm <sup>-2</sup><br>(NIR, 808 nm)        | 10                 | 502.78                                 | 1               |
| 2     | PPy/Ag <sub>2</sub> Se                                                               | 100 mW cm <sup>-2</sup><br>(NIR, 808 nm)       | 1                  | 600.00                                 | 2               |
| 3     | PEDOT:PSS/HCNTs                                                                      | 166.01 mW cm <sup>-2</sup><br>(NIR, 808 nm)    | 3                  | 2.83                                   | 3               |
| 4     | PPy/HCNTs                                                                            | 400 mW cm <sup>-2</sup><br>(NIR, 808 nm)       | 1                  | 0.0446                                 | 4               |
| 5     | Mo <sub>2</sub> S/PU-PEDOT:PSS/Te NWs                                                | 2625 mW cm <sup>-2</sup><br>(NIR, 808 nm)      | 1                  | 0.0432                                 | 5               |
| 6     | Ag <sub>2</sub> Se/Nylon                                                             | <b>100 mW cm<sup>-2</sup></b><br>(NIR, 808 nm) | 4                  | <b>3265.63</b>                         | <b>Our work</b> |

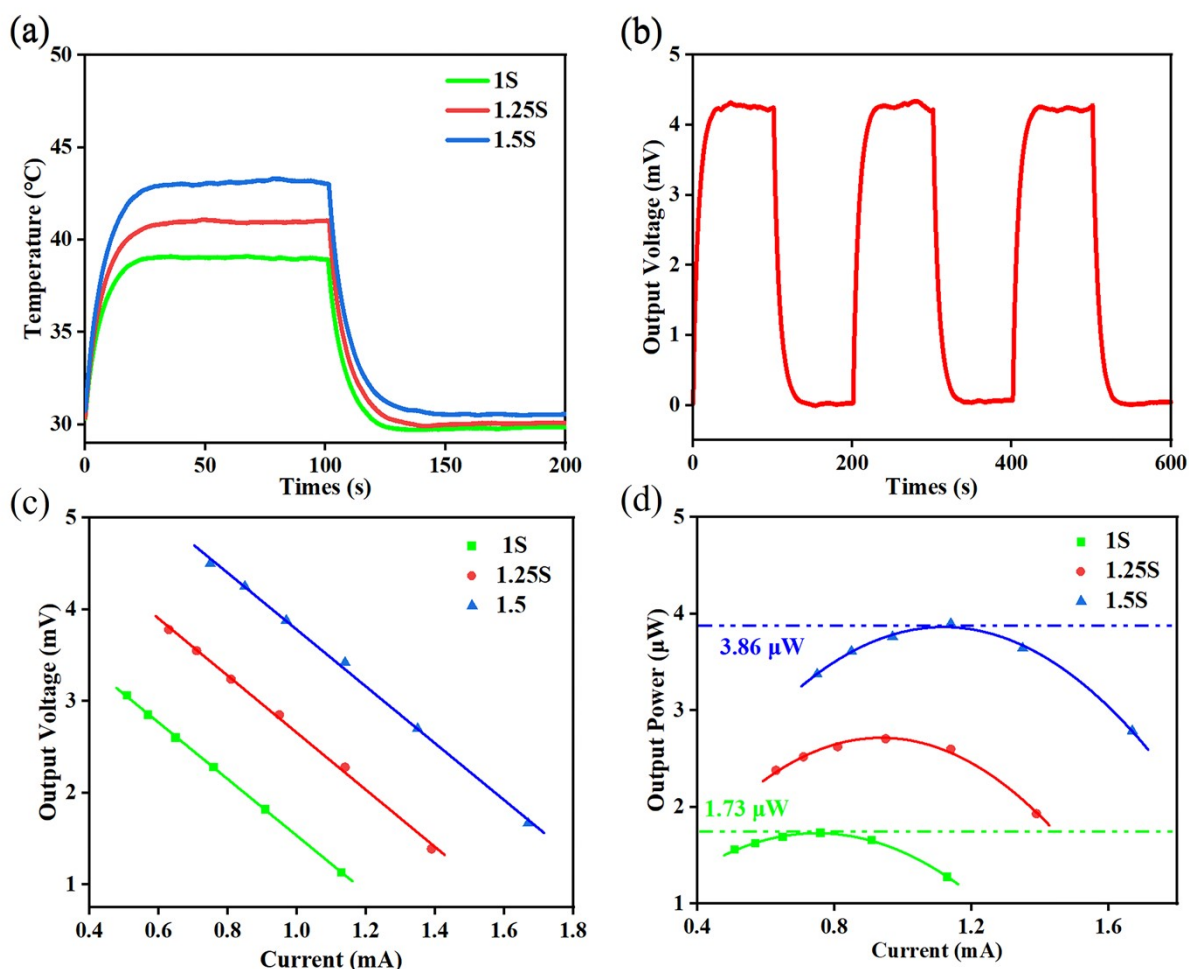

**Figure S17.** (a) Temperature changes of the 80Ag<sub>2</sub>Se/20Nylon under different intensities of visible light irradiation. (b) The cyclic open-circuit voltage response of the PTEG under 1S visible light irradiation. (c) The output voltage and (d) power of the PTEG as a function of current at different radiation power of visible light.

## Reference

- 1 X. Z. Jin, H. Li, Y. Wang, Z. Y. Yang, X. D. Qi, J. H. Yang and Y. Wang, *ACS Appl. Mater. Interfaces.*, 2022, **14**, 27083-27095.
- 2 D. L. Wen, X. Liu, J. F. Bao, G. K. Li, T. Feng, F. Zhang, D. Liu and X. S. Zhang, *ACS Appl. Mater. Interfaces.*, 2021, **13**, 21401-21410.
- 3 X. Z. Jin, X. D. Qi, Y. Wang, J. H. Yang, H. Li, Z. W. Zhou and Y. Wang, *ACS Appl. Mater. Interfaces.*, 2021, **13**, 8808-8822.
- 4 Z. Y. Yang, X. Z. Jin, C. H. Huang, Y. Z. Lei and Y. Wang, *ACS Appl. Mater. Interfaces.*, 2022, **14**, 33370-33382.
- 5 M. He, Y.-J. Lin, C.-M. Chiu, W. Yang, B. Zhang, D. Yun, Y. Xie and Z.-H. Lin, *Nano Energy*, 2018, **49**, 588-595.
